# Supplementary material for: Associations Between Mother-Adolescent and Father-Adolescent Relationships and Young Adult Health
Source: PubMed Central journal article supplement (PMC10031392; doi:10.1001/jamanetworkopen.2023.3944), 2023-03-21
Supplement: jamanetwopen-e233944-s002.pdf [file jamanetwopen-e233944-s002.pdf]

## Data Sharing Statement

Ford. Associations Between Mother-Adolescent and Father-Adolescent Relationships and Young Adult Health. *JAMA Netw Open*. Published March 21, 2023.

doi:10.1001/jamanetworkopen.2023.3944

### Data

**Data available:** No

### Additional Information

**Explanation for why data not available:** Data for this report were obtained via a user contract from the core Add Health Study. This data is available to others via a user contract from the core Add Health study team.
